# Supplementary material for: Development of a Novel In Silico Classification Model to Assess Reactive Metabolite Formation in the Cysteine Trapping Assay and Investigation of Important Substructures
Source: MDPI journal article supplement (doi:10.3390/biom14050535), 2024-04-30
Supplement: s1 [file s1]

# Supporting Information

**Development of a novel *in silico* classification model to  
assess reactive metabolite formation in the cysteine  
trapping assay and investigation of important  
substructures**

**Yuki Umemori<sup>1</sup>, Koichi Handa<sup>1\*</sup>, Saki Yoshimura<sup>1</sup>, Michiharu  
Kageyama<sup>1</sup>, Takeshi Iijima<sup>1</sup>**

<sup>1</sup>DMPK Research Department, Teijin Institute for Bio-medical Research,  
TEIJIN PHARMA LIMITED, 4-3-2 Asahigaoka, Hino-shi, Tokyo 191-  
8512, Japan

**\* Correspondence:**

Dr. Koichi Handa

koichi.handa@axcelead-twp.com

**Table S1. Dataset for cysteine trapping assay (475 compounds).**

| Compound<br>Name | RI integrated area (count) | Positive (P) / Negative (N) |
|------------------|----------------------------|-----------------------------|
| Acetaminophen    | 1791.7                     | P                           |
| Aminopyrine      | 44.3                       | N                           |
| Amlodipine       | 42.9                       | N                           |
| Amodiaquine      | 346.7                      | N                           |
| Atorvastatin     | 4464.4                     | P                           |
| Benzbromarone    | 4516.4                     | P                           |
| Caffeine         | 22.4                       | N                           |
| Carbamazepine    | 61.8                       | N                           |
| Clopidogrel      | 708.2                      | N                           |
| Clozapine        | 1286.4                     | P                           |
| Diclofenac       | 1230.1                     | P                           |
| Donepezil        | 38.4                       | N                           |
| Erythromycin     | 10.3                       | N                           |
| Fluoxetine       | 153.8                      | N                           |
| Flutamide        | 680.4                      | N                           |
| Furosemide       | 768.1                      | N                           |
| Ibrutinib        | 1603.8                     | P                           |
| Imipramine       | 2689.4                     | P                           |
| Indomethacin     | 89.0                       | N                           |
| Levofloxacin     | 150.3                      | N                           |
| Olanzapine       | 4161.2                     | P                           |
| Osimertinib      | 2319.2                     | P                           |
| Phenytoin        | 34.7                       | N                           |
| Pioglitazone     | 105.8                      | N                           |
| Pravastatin      | 25.4                       | N                           |
| Propranolol      | 3667.2                     | P                           |
| Ritonavir        | 593.9                      | N                           |
| Rosiglitazone    | 1593.7                     | P                           |
| Sulfamethoxazole | 89.0                       | N                           |

| Compound<br>Name | RI integrated area (count) | Positive (P) / Negative (N) |
|------------------|----------------------------|-----------------------------|
| Tacrine          | 243.5                      | N                           |
| Tamoxifen        | 162.1                      | N                           |
| Ticlopidine      | 646.0                      | N                           |
| Tienilic acid    | 3783.7                     | P                           |
| Troglitazone     | 521.7                      | N                           |
| Troleandomycin   | 68.8                       | N                           |
| Verapamil        | 1087.2                     | P                           |
| Warfarin         | 79.6                       | N                           |
| Zafirlukast      | 263.4                      | N                           |
| Zomepirac        | 217.5                      | N                           |
| In-house 1       | 51962.0                    | P                           |
| In-house 2       | 868.6                      | N                           |
| In-house 3       | 128939.9                   | P                           |
| In-house 4       | 734.6                      | N                           |
| In-house 5       | 153.0                      | N                           |
| In-house 6       | 41741.7                    | P                           |
| In-house 7       | 219.6                      | N                           |
| In-house 8       | 713.3                      | N                           |
| In-house 9       | 569.0                      | N                           |
| In-house 10      | 836.3                      | N                           |
| In-house 11      | 1483.2                     | P                           |
| In-house 12      | 227.2                      | N                           |
| In-house 13      | 120.3                      | N                           |
| In-house 14      | 18536.6                    | P                           |
| In-house 15      | 8275.8                     | P                           |
| In-house 16      | 465.5                      | N                           |
| In-house 17      | 277.3                      | N                           |
| In-house 18      | 7079.9                     | P                           |
| In-house 19      | 550.8                      | N                           |
| In-house 20      | 2336.0                     | P                           |

| Compound<br>Name | RI integrated area (count) | Positive (P) / Negative (N) |
|------------------|----------------------------|-----------------------------|
| In-house 21      | 1016.9                     | P                           |
| In-house 22      | 252.1                      | N                           |
| In-house 23      | 756.9                      | N                           |
| In-house 24      | 5760.5                     | P                           |
| In-house 25      | 387.7                      | N                           |
| In-house 26      | 1683.4                     | P                           |
| In-house 27      | 201.7                      | N                           |
| In-house 28      | 394.4                      | N                           |
| In-house 29      | 147.7                      | N                           |
| In-house 30      | 1084.6                     | P                           |
| In-house 31      | 471.4                      | N                           |
| In-house 32      | 286.3                      | N                           |
| In-house 33      | 436.0                      | N                           |
| In-house 34      | 635.4                      | N                           |
| In-house 35      | 112.7                      | N                           |
| In-house 36      | 2405.2                     | P                           |
| In-house 37      | 471.6                      | N                           |
| In-house 38      | 435.8                      | N                           |
| In-house 39      | 526.1                      | N                           |
| In-house 40      | 400.7                      | N                           |
| In-house 41      | 2561.3                     | P                           |
| In-house 42      | 466.8                      | N                           |
| In-house 43      | 333.2                      | N                           |
| In-house 44      | 315.7                      | N                           |
| In-house 45      | 263.7                      | N                           |
| In-house 46      | 332.6                      | N                           |
| In-house 47      | 391.9                      | N                           |
| In-house 48      | 260.9                      | N                           |
| In-house 49      | 646.6                      | N                           |
| In-house 50      | 423.6                      | N                           |

| Compound<br>Name | RI integrated area (count) | Positive (P) / Negative (N) |
|------------------|----------------------------|-----------------------------|
| In-house 51      | 918.3                      | N                           |
| In-house 52      | 686.0                      | N                           |
| In-house 53      | 8498.4                     | P                           |
| In-house 54      | 1516.7                     | P                           |
| In-house 55      | 1438.0                     | P                           |
| In-house 56      | 371.6                      | N                           |
| In-house 57      | 31509.3                    | P                           |
| In-house 58      | 376.3                      | N                           |
| In-house 59      | 442.8                      | N                           |
| In-house 60      | 440.2                      | N                           |
| In-house 61      | 721.9                      | N                           |
| In-house 62      | 262.7                      | N                           |
| In-house 63      | 205.0                      | N                           |
| In-house 64      | 291.3                      | N                           |
| In-house 65      | 451.0                      | N                           |
| In-house 66      | 361.5                      | N                           |
| In-house 67      | 205.5                      | N                           |
| In-house 68      | 248.3                      | N                           |
| In-house 69      | 362.4                      | N                           |
| In-house 70      | 6152.5                     | P                           |
| In-house 71      | 114.5                      | N                           |
| In-house 72      | 351.9                      | N                           |
| In-house 73      | 533.4                      | N                           |
| In-house 74      | 370.1                      | N                           |
| In-house 75      | 101.1                      | N                           |
| In-house 76      | 1517.4                     | P                           |
| In-house 77      | 2246.7                     | P                           |
| In-house 78      | 1436.3                     | P                           |
| In-house 79      | 210.7                      | N                           |
| In-house 80      | 25.3                       | N                           |

| Compound<br>Name | RI integrated area (count) | Positive (P) / Negative (N) |
|------------------|----------------------------|-----------------------------|
| In-house 81      | 83.2                       | N                           |
| In-house 82      | 844.1                      | N                           |
| In-house 83      | 133.7                      | N                           |
| In-house 84      | 96.1                       | N                           |
| In-house 85      | 203.5                      | N                           |
| In-house 86      | 176.3                      | N                           |
| In-house 87      | 107.3                      | N                           |
| In-house 88      | 572.3                      | N                           |
| In-house 89      | 91.7                       | N                           |
| In-house 90      | 36487.1                    | P                           |
| In-house 91      | 180.8                      | N                           |
| In-house 92      | 466.4                      | N                           |
| In-house 93      | 1362.1                     | P                           |
| In-house 94      | 1138.2                     | P                           |
| In-house 95      | 377.9                      | N                           |
| In-house 96      | 206.7                      | N                           |
| In-house 97      | 2788.4                     | P                           |
| In-house 98      | 538.0                      | N                           |
| In-house 99      | 53.1                       | N                           |
| In-house 100     | 5858.3                     | P                           |
| In-house 101     | 270.1                      | N                           |
| In-house 102     | 486.9                      | N                           |
| In-house 103     | 414.8                      | N                           |
| In-house 104     | 215.8                      | N                           |
| In-house 105     | 221.9                      | N                           |
| In-house 106     | 339.4                      | N                           |
| In-house 107     | 805.1                      | N                           |
| In-house 108     | 763.7                      | N                           |
| In-house 109     | 6817.1                     | P                           |
| In-house 110     | 1155.6                     | P                           |

| Compound<br>Name | RI integrated area (count) | Positive (P) / Negative (N) |
|------------------|----------------------------|-----------------------------|
| In-house 111     | 2047.0                     | P                           |
| In-house 112     | 633.2                      | N                           |
| In-house 113     | 6784.0                     | P                           |
| In-house 114     | 2306.2                     | P                           |
| In-house 115     | 107.1                      | N                           |
| In-house 116     | 3306.0                     | P                           |
| In-house 117     | 1370.6                     | P                           |
| In-house 118     | 142.6                      | N                           |
| In-house 119     | 132.7                      | N                           |
| In-house 120     | 22.0                       | N                           |
| In-house 121     | 2287.6                     | P                           |
| In-house 122     | 5489.1                     | P                           |
| In-house 123     | 10185.7                    | P                           |
| In-house 124     | 939.7                      | N                           |
| In-house 125     | 1435.3                     | P                           |
| In-house 126     | 840.9                      | N                           |
| In-house 127     | 1769.2                     | P                           |
| In-house 128     | 646.3                      | N                           |
| In-house 129     | 10937.1                    | P                           |
| In-house 130     | 9382.6                     | P                           |
| In-house 131     | 1716.6                     | P                           |
| In-house 132     | 957.1                      | N                           |
| In-house 133     | 2082.3                     | P                           |
| In-house 134     | 705.8                      | N                           |
| In-house 135     | 1673.1                     | P                           |
| In-house 136     | 217.9                      | N                           |
| In-house 137     | 7733.3                     | P                           |
| In-house 138     | 1057.4                     | P                           |
| In-house 139     | 2770.4                     | P                           |
| In-house 140     | 1421.9                     | P                           |

| Compound<br>Name | RI integrated area (count) | Positive (P) / Negative (N) |
|------------------|----------------------------|-----------------------------|
| In-house 141     | 2479.0                     | P                           |
| In-house 142     | 1706.6                     | P                           |
| In-house 143     | 4185.0                     | P                           |
| In-house 144     | 1379.7                     | P                           |
| In-house 145     | 4424.8                     | P                           |
| In-house 146     | 20.3                       | N                           |
| In-house 147     | 3571.5                     | P                           |
| In-house 148     | 1016.3                     | P                           |
| In-house 149     | 2120.7                     | P                           |
| In-house 150     | 1663.9                     | P                           |
| In-house 151     | 985.7                      | N                           |
| In-house 152     | 6627.2                     | P                           |
| In-house 153     | 1046.8                     | P                           |
| In-house 154     | 280.4                      | N                           |
| In-house 155     | 4.0                        | N                           |
| In-house 156     | 599.7                      | N                           |
| In-house 157     | 3604.6                     | P                           |
| In-house 158     | 417.3                      | N                           |
| In-house 159     | 444.2                      | N                           |
| In-house 160     | 639.3                      | N                           |
| In-house 161     | 73.0                       | N                           |
| In-house 162     | 1675.7                     | P                           |
| In-house 163     | 17.4                       | N                           |
| In-house 164     | 2.7                        | N                           |
| In-house 165     | 1168.7                     | P                           |
| In-house 166     | 5376.6                     | P                           |
| In-house 167     | 183.2                      | N                           |
| In-house 168     | 1265.0                     | P                           |
| In-house 169     | 549.7                      | N                           |
| In-house 170     | 647.1                      | N                           |



| Compound<br>Name | RI integrated area (count) | Positive (P) / Negative (N) |
|------------------|----------------------------|-----------------------------|
| In-house 171     | 85.7                       | N                           |
| In-house 172     | 4966.4                     | P                           |
| In-house 173     | 881.7                      | N                           |
| In-house 174     | 4055.7                     | P                           |
| In-house 175     | 8226.7                     | P                           |
| In-house 176     | 652.8                      | N                           |
| In-house 177     | 50.2                       | N                           |
| In-house 178     | 512.5                      | N                           |
| In-house 179     | 519.6                      | N                           |
| In-house 180     | 2802.7                     | P                           |
| In-house 181     | 846.5                      | N                           |
| In-house 182     | 1342.1                     | P                           |
| In-house 183     | 3817.2                     | P                           |
| In-house 184     | 196.6                      | N                           |
| In-house 185     | 1596.1                     | P                           |
| In-house 186     | 110.7                      | N                           |
| In-house 187     | 78.6                       | N                           |
| In-house 188     | 931.6                      | N                           |
| In-house 189     | 1635.7                     | P                           |
| In-house 190     | 4325.7                     | P                           |
| In-house 191     | 6513.4                     | P                           |
| In-house 192     | 1259.3                     | P                           |
| In-house 193     | 3623.5                     | P                           |
| In-house 194     | 2021.4                     | P                           |
| In-house 195     | 728.7                      | N                           |
| In-house 196     | 28779.4                    | P                           |
| In-house 197     | 29.6                       | N                           |
| In-house 198     | 44.3                       | N                           |
| In-house 199     | 317.3                      | N                           |
| In-house 200     | 15.4                       | N                           |

| Compound<br>Name | RI integrated area (count) | Positive (P) / Negative (N) |
|------------------|----------------------------|-----------------------------|
| In-house 201     | 2939.1                     | P                           |
| In-house 202     | 24.1                       | N                           |
| In-house 203     | 3130.7                     | P                           |
| In-house 204     | 457.0                      | N                           |
| In-house 205     | 4338.6                     | P                           |
| In-house 206     | 178.7                      | N                           |
| In-house 207     | 1865.7                     | P                           |
| In-house 208     | 1345.6                     | P                           |
| In-house 209     | 744.4                      | N                           |
| In-house 210     | 416.8                      | N                           |
| In-house 211     | 1419.0                     | P                           |
| In-house 212     | 5395.1                     | P                           |
| In-house 213     | 1949.8                     | P                           |
| In-house 214     | 686.9                      | N                           |
| In-house 215     | 336.3                      | N                           |
| In-house 216     | 717.6                      | N                           |
| In-house 217     | 9270.8                     | P                           |
| In-house 218     | 6421.7                     | P                           |
| In-house 219     | 535.5                      | N                           |
| In-house 220     | 618.0                      | N                           |
| In-house 221     | 373.5                      | N                           |
| In-house 222     | 1945.6                     | P                           |
| In-house 223     | 2225.9                     | P                           |
| In-house 224     | 6416.8                     | P                           |
| In-house 225     | 319.3                      | N                           |
| In-house 226     | 6315.0                     | P                           |
| In-house 227     | 1450.7                     | P                           |
| In-house 228     | 6915.6                     | P                           |
| In-house 229     | 58.9                       | N                           |
| In-house 230     | 9632.8                     | P                           |

| Compound<br>Name | RI integrated area (count) | Positive (P) / Negative (N) |
|------------------|----------------------------|-----------------------------|
| In-house 231     | 3757.8                     | P                           |
| In-house 232     | 32806.5                    | P                           |
| In-house 233     | 381.6                      | N                           |
| In-house 234     | 3729.8                     | P                           |
| In-house 235     | 5257.2                     | P                           |
| In-house 236     | 668.7                      | N                           |
| In-house 237     | 3053.2                     | P                           |
| In-house 238     | 5852.9                     | P                           |
| In-house 239     | 350.1                      | N                           |
| In-house 240     | 456.0                      | N                           |
| In-house 241     | 538.4                      | N                           |
| In-house 242     | 669.9                      | N                           |
| In-house 243     | 5438.2                     | P                           |
| In-house 244     | 7636.5                     | P                           |
| In-house 245     | 24082.9                    | P                           |
| In-house 246     | 3637.6                     | P                           |
| In-house 247     | 522.5                      | N                           |
| In-house 248     | 47.0                       | N                           |
| In-house 249     | 49.7                       | N                           |
| In-house 250     | 44.7                       | N                           |
| In-house 251     | 140.5                      | N                           |
| In-house 252     | 165.3                      | N                           |
| In-house 253     | 324.7                      | N                           |
| In-house 254     | 104.0                      | N                           |
| In-house 255     | 263.9                      | N                           |
| In-house 256     | 4002.9                     | P                           |
| In-house 257     | 7790.0                     | P                           |
| In-house 258     | 512.7                      | N                           |
| In-house 259     | 3378.3                     | P                           |
| In-house 260     | 72.0                       | N                           |

| Compound<br>Name | RI integrated area (count) | Positive (P) / Negative (N) |
|------------------|----------------------------|-----------------------------|
| In-house 261     | 40.2                       | N                           |
| In-house 262     | 958.5                      | N                           |
| In-house 263     | 4807.9                     | P                           |
| In-house 264     | 298.0                      | N                           |
| In-house 265     | 3179.1                     | P                           |
| In-house 266     | 2672.4                     | P                           |
| In-house 267     | 6296.2                     | P                           |
| In-house 268     | 481.9                      | N                           |
| In-house 269     | 6831.8                     | P                           |
| In-house 270     | 4285.5                     | P                           |
| In-house 271     | 105.0                      | N                           |
| In-house 272     | 24248.2                    | P                           |
| In-house 273     | 60837.2                    | P                           |
| In-house 274     | 556.5                      | N                           |
| In-house 275     | 2505.7                     | P                           |
| In-house 276     | 29282.3                    | P                           |
| In-house 277     | 393.7                      | N                           |
| In-house 278     | 394.5                      | N                           |
| In-house 279     | 4490.1                     | P                           |
| In-house 280     | 1222.8                     | P                           |
| In-house 281     | 70.1                       | N                           |
| In-house 282     | 4195.0                     | P                           |
| In-house 283     | 1722.3                     | P                           |
| In-house 284     | 2266.7                     | P                           |
| In-house 285     | 670.8                      | N                           |
| In-house 286     | 847.8                      | N                           |
| In-house 287     | 278.8                      | N                           |
| In-house 288     | 6777.8                     | P                           |
| In-house 289     | 1183.0                     | P                           |
| In-house 290     | 4267.1                     | P                           |

| Compound<br>Name | RI integrated area (count) | Positive (P) / Negative (N) |
|------------------|----------------------------|-----------------------------|
| In-house 291     | 115.9                      | N                           |
| In-house 292     | 4672.3                     | P                           |
| In-house 293     | 20944.8                    | P                           |
| In-house 294     | 25974.3                    | P                           |
| In-house 295     | 7221.3                     | P                           |
| In-house 296     | 215.7                      | N                           |
| In-house 297     | 2196.1                     | P                           |
| In-house 298     | 3796.6                     | P                           |
| In-house 299     | 1406.0                     | P                           |
| In-house 300     | 1877.8                     | P                           |
| In-house 301     | 2074.6                     | P                           |
| In-house 302     | 1396.1                     | P                           |
| In-house 303     | 3866.0                     | P                           |
| In-house 304     | 858.5                      | N                           |
| In-house 305     | 4715.7                     | P                           |
| In-house 306     | 15638.8                    | P                           |
| In-house 307     | 5225.1                     | P                           |
| In-house 308     | 5346.0                     | P                           |
| In-house 309     | 1471.2                     | P                           |
| In-house 310     | 13337.0                    | P                           |
| In-house 311     | 798.3                      | N                           |
| In-house 312     | 14559.9                    | P                           |
| In-house 313     | 6031.5                     | P                           |
| In-house 314     | 5673.8                     | P                           |
| In-house 315     | 22860.4                    | P                           |
| In-house 316     | 4634.2                     | P                           |
| In-house 317     | 19099.9                    | P                           |
| In-house 318     | 3672.7                     | P                           |
| In-house 319     | 19637.6                    | P                           |
| In-house 320     | 4549.0                     | P                           |

| Compound<br>Name | RI integrated area (count) | Positive (P) / Negative (N) |
|------------------|----------------------------|-----------------------------|
| In-house 321     | 1129.6                     | P                           |
| In-house 322     | 5896.7                     | P                           |
| In-house 323     | 5941.6                     | P                           |
| In-house 324     | 17099.3                    | P                           |
| In-house 325     | 15824.5                    | P                           |
| In-house 326     | 4531.9                     | P                           |
| In-house 327     | 15509.1                    | P                           |
| In-house 328     | 2694.4                     | P                           |
| In-house 329     | 901.7                      | N                           |
| In-house 330     | 3031.2                     | P                           |
| In-house 331     | 12404.6                    | P                           |
| In-house 332     | 1496.9                     | P                           |
| In-house 333     | 3865.7                     | P                           |
| In-house 334     | 1266.1                     | P                           |
| In-house 335     | 1538.9                     | P                           |
| In-house 336     | 2784.2                     | P                           |
| In-house 337     | 2810.2                     | P                           |
| In-house 338     | 6882.1                     | P                           |
| In-house 339     | 6897.0                     | P                           |
| In-house 340     | 4545.2                     | P                           |
| In-house 341     | 13212.3                    | P                           |
| In-house 342     | 6363.1                     | P                           |
| In-house 343     | 12436.4                    | P                           |
| In-house 344     | 2636.0                     | P                           |
| In-house 345     | 2246.6                     | P                           |
| In-house 346     | 806.7                      | N                           |
| In-house 347     | 2421.0                     | P                           |
| In-house 348     | 2068.7                     | P                           |
| In-house 349     | 2266.7                     | P                           |
| In-house 350     | 1346.7                     | P                           |

| Compound<br>Name | RI integrated area (count) | Positive (P) / Negative (N) |
|------------------|----------------------------|-----------------------------|
| In-house 351     | 220.2                      | N                           |
| In-house 352     | 19322.0                    | P                           |
| In-house 353     | 5957.0                     | P                           |
| In-house 354     | 1419.8                     | P                           |
| In-house 355     | 20522.2                    | P                           |
| In-house 356     | 6501.4                     | P                           |
| In-house 357     | 5952.7                     | P                           |
| In-house 358     | 11560.2                    | P                           |
| In-house 359     | 3532.3                     | P                           |
| In-house 360     | 14321.3                    | P                           |
| In-house 361     | 1956.9                     | P                           |
| In-house 362     | 5563.4                     | P                           |
| In-house 363     | 1439.6                     | P                           |
| In-house 364     | 6793.5                     | P                           |
| In-house 365     | 2543.4                     | P                           |
| In-house 366     | 2151.7                     | P                           |
| In-house 367     | 2375.6                     | P                           |
| In-house 368     | 1678.7                     | P                           |
| In-house 369     | 1513.8                     | P                           |
| In-house 370     | 3645.4                     | P                           |
| In-house 371     | 1320.1                     | P                           |
| In-house 372     | 3380.3                     | P                           |
| In-house 373     | 523.6                      | N                           |
| In-house 374     | 2014.4                     | P                           |
| In-house 375     | 972.8                      | N                           |
| In-house 376     | 3435.5                     | P                           |
| In-house 377     | 1783.0                     | P                           |
| In-house 378     | 824.6                      | N                           |
| In-house 379     | 1915.6                     | P                           |
| In-house 380     | 1806.7                     | P                           |

| Compound<br>Name | RI integrated area<br>(count) | Positive (P) / Negative (N) |
|------------------|-------------------------------|-----------------------------|
| In-house 381     | 2795.7                        | P                           |
| In-house 382     | 3882.0                        | P                           |
| In-house 383     | 4097.5                        | P                           |
| In-house 384     | 1906.9                        | P                           |
| In-house 385     | 1940.6                        | P                           |
| In-house 386     | 7993.1                        | P                           |
| In-house 387     | 1898.4                        | P                           |
| In-house 388     | 2130.9                        | P                           |
| In-house 389     | 711.6                         | N                           |
| In-house 390     | 1496.3                        | P                           |
| In-house 391     | 8257.7                        | P                           |
| In-house 392     | 824.9                         | N                           |
| In-house 393     | 937.4                         | N                           |
| In-house 394     | 10302.6                       | P                           |
| In-house 395     | 3975.9                        | P                           |
| In-house 396     | 33670.4                       | P                           |
| In-house 397     | 2246.1                        | P                           |
| In-house 398     | 318.8                         | N                           |
| In-house 399     | 403.2                         | N                           |
| In-house 400     | 114.0                         | N                           |
| In-house 401     | 345.8                         | N                           |
| In-house 402     | 358.4                         | N                           |
| In-house 403     | 805.5                         | N                           |
| In-house 404     | 622.5                         | N                           |
| In-house 405     | 311.5                         | N                           |
| In-house 406     | 137.2                         | N                           |
| In-house 407     | 59.0                          | N                           |
| In-house 408     | 16879.5                       | P                           |
| In-house 409     | 304.2                         | N                           |
| In-house 410     | 672.6                         | N                           |



| Compound<br>Name | RI integrated area<br>(count) | Positive (P) / Negative (N) |
|------------------|-------------------------------|-----------------------------|
| In-house 411     | 581.7                         | N                           |
| In-house 412     | 1503.2                        | P                           |
| In-house 413     | 2363.5                        | P                           |
| In-house 414     | 3016.0                        | P                           |
| In-house 415     | 564.1                         | N                           |
| In-house 416     | 1478.8                        | P                           |
| In-house 417     | 1020.2                        | P                           |
| In-house 418     | 149.9                         | N                           |
| In-house 419     | 456.6                         | N                           |
| In-house 420     | 100482.3                      | P                           |
| In-house 421     | 1027.2                        | P                           |
| In-house 422     | 1555.9                        | P                           |
| In-house 423     | 2004.9                        | P                           |
| In-house 424     | 18548.5                       | P                           |
| In-house 425     | 910.0                         | N                           |
| In-house 426     | 3603.9                        | P                           |
| In-house 427     | 5867.3                        | P                           |
| In-house 428     | 3730.5                        | P                           |
| In-house 429     | 567.9                         | N                           |
| In-house 430     | 481.5                         | N                           |
| In-house 431     | 770.4                         | N                           |
| In-house 432     | 164.6                         | N                           |
| In-house 433     | 627.9                         | N                           |
| In-house 434     | 529.6                         | N                           |
| In-house 435     | 473.1                         | N                           |
| In-house 436     | 3842.0                        | P                           |

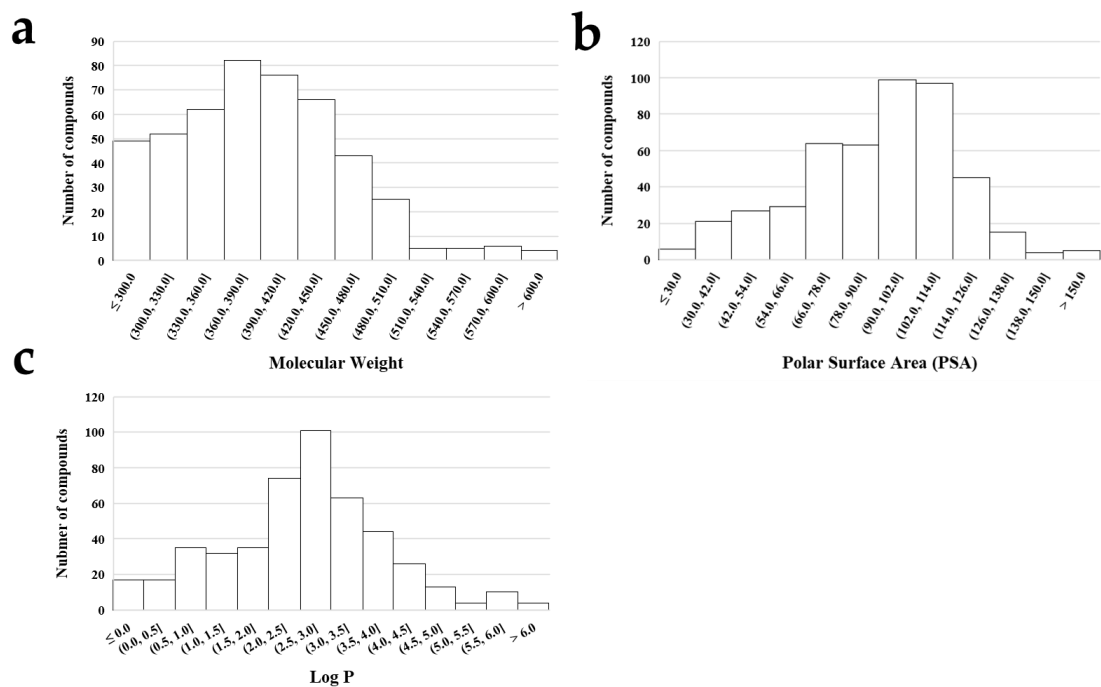

**Figure S1. Distribution of Physicochemical Parameters**

Molecular Weight (A), Polar Surface Area (PSA) (B), Log P (C) of 475 compounds used for QSAR modeling.

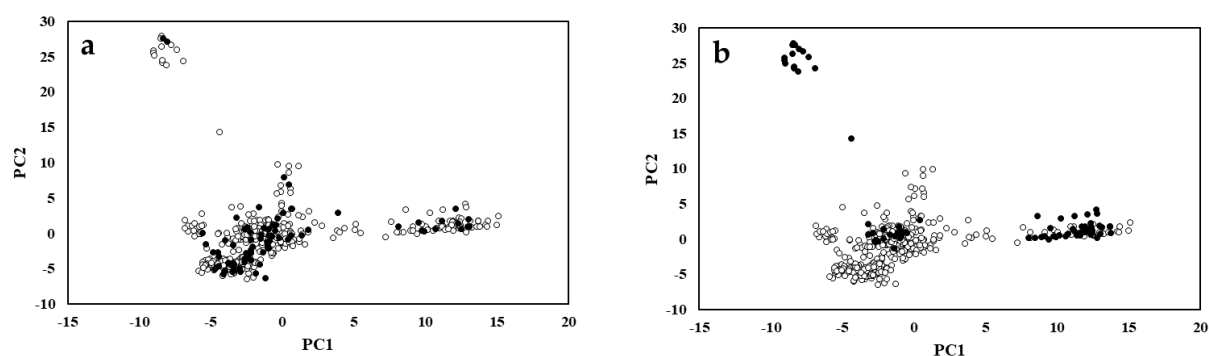

**Figure S2. PCA plot of training and test dataset using Extended Connectivity FingerPrint 4 (a: Random-split b: Time-split)**

PCA was conducted using PCA function from scikit-learn (ver. 1.2.2) library in python (ver. 3.11.8). In python, the compound structure in canonical SMILES format was read, Extended Connectivity FingerPrint 4 (ECFP4) was calculated as a fingerprint, and after normalization PCA analysis was performed with two components. White and black circles indicate compounds used in the training and external datasets, respectively. The contribution ratio of PC1 and PC2 is 3.4%.
